# Supplementary material for: Effectiveness and User Perception of an In-Vehicle Voice Warning for Hypoglycemia: Development and Feasibility Trial
Source: PubMed Central journal article supplement (PMC10813835; doi:10.2196/42823), 2024-01-09
Supplement: humanfactors_v11i1e42823_app2.pdf [file humanfactors_v11i1e42823_app2.pdf]

## Appendix 2: Questions of the semi-structured interview about their experience with the warning conducted in Study 1 and Study 2.

Bérubé et al. 2023

### Study 1

| <b>Original (German)</b>                                                                                                       | <b>English translation</b>                                                                               |
|--------------------------------------------------------------------------------------------------------------------------------|----------------------------------------------------------------------------------------------------------|
| Wie haben Sie die Nachrichten vom Sprachassistent im Allgemein wahrgenommen? Was haben Sie darüber gedacht?                    | How did you perceive the notifications from the voice assistant in general? What did you think about it? |
| Was hat Ihnen gefallen?                                                                                                        | What did you like?                                                                                       |
| Was hat Ihnen nicht gefallen?                                                                                                  | What did you not like?                                                                                   |
| Was könnte an der Benachrichtigung geändert bzw. verbessert werden?                                                            | What could be changed or improved about the notification?                                                |
| Was würde Ihnen helfen, (noch) mehr den Sprachassistent als Unterstützung für die Unterzuckerung beim Autofahren zu vertrauen? | What would help you trust (even) more the voice assistant as a support for hypoglycemia while driving?   |

### Study 2

| <b>Original (German)</b>                                                 | <b>English translation</b>                                               |
|--------------------------------------------------------------------------|--------------------------------------------------------------------------|
| Wie würden Sie Ihre Gesamterfahrung mit dem Sprachassistent beschreiben? | How would you describe your overall experience with the voice assistant? |
| Was hat Ihnen bei der Verwendung den Sprachassistent am besten gefallen? | What did you like most about using the voice assistant?                  |
| Was hat Ihnen am wenigsten gefallen?                                     | What did you like the least?                                             |
| Was könnte noch verbessert werden?                                       | What could still be improved?                                            |
| Wie haben Sie die Benachrichtigung im Allgemein wahrgenommen?            | How did you perceive the notification in general?                        |
| Was könnte [an der Benachrichtigung] geändert bzw. verbessert werden?    | What could be changed or improved [about the notification]?              |
