# Supplementary material for: Effectiveness and User Perception of an In-Vehicle Voice Warning for Hypoglycemia: Development and Feasibility Trial
Source: PubMed Central journal article supplement (PMC10813835; doi:10.2196/42823), 2024-01-09
Supplement: humanfactors_v11i1e42823_app3.pdf [file humanfactors_v11i1e42823_app3.pdf]

### Multimedia Appendix 3: Illustration of procedure across studies

Bérubé et al. 2023

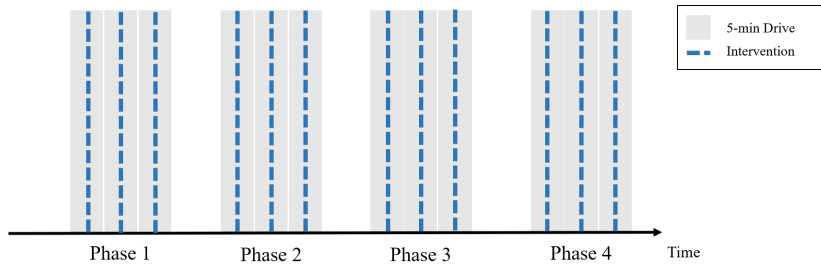

**Supplementary fig. 1** Warning ( $t=100$  sec or  $t=200$  sec) in Study 0. This figure is shown to allow comparison across studies.

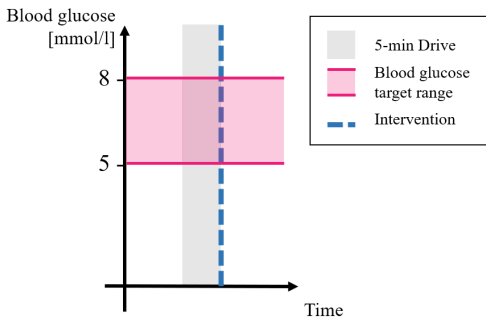

**Supplementary fig. 3** Warning delivery procedure in Study 1. This figure is shown to allow comparison across studies.

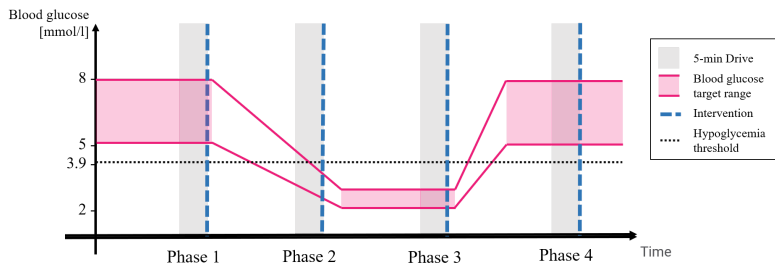

**Supplementary fig. 3** Overview of the blood glucose manipulation and warning deliveries across the four driving phases in Study 2. This figure is shown to allow comparison across studies.
